# Supplementary material for: hsa_circ_0003738 Inhibits the Suppressive Function of Tregs by Targeting miR-562/IL-17A and miR-490-5p/IFN-γ Signaling Pathway
Source: PubMed Central journal article supplement (PMC7475646; doi:10.1016/j.omtn.2020.08.001), 2020-08-05
Supplement: mmc1.pdf [file mmc1.pdf]

OMTN, Volume 21

## Supplemental Information

**hsa\_circ\_0003738 Inhibits the Suppressive  
Function of Tregs by Targeting miR-562/IL-17A  
and miR-490-5p/IFN- $\gamma$  Signaling Pathway**

**Luting Yang, Chen Zhang, Xiaocui Bai, Chunying Xiao, Erle Dang, and Gang Wang**

Supplementary Materials and Methods

Circular RNA hsa\_circ\_0003738 inhibits the suppressive function of Tregs in psoriatic patients by targeting miR-562/IL-17A and miR-490-5p/IFN- $\gamma$  signaling pathway

Table S1 Upregulated circRNAs in psoriatic Tregs

| <b>P-value</b> | <b>FC (abs)</b> | <b>circRNA</b>     | <b>Alias</b>     | <b>circRNA_<br/>type</b> |
|----------------|-----------------|--------------------|------------------|--------------------------|
| 0.034084828    | 3.3505229       | hsa_circRNA_001175 | hsa_circ_0001658 | exonic                   |
| 0.030387321    | 1.5121903       | hsa_circRNA_100119 | hsa_circ_0002909 | exonic                   |
| 0.032145082    | 1.5124685       | hsa_circRNA_100120 | hsa_circ_0000038 | exonic                   |
| 0.040528595    | 1.7819617       | hsa_circRNA_100750 | hsa_circ_0020929 | exonic                   |
| 0.04883818     | 1.6535833       | hsa_circRNA_101031 | hsa_circ_0007478 | exonic                   |
| 0.044809406    | 1.547614        | hsa_circRNA_101141 | hsa_circ_0005785 | exonic                   |
| 0.0458853      | 1.5419384       | hsa_circRNA_101550 | hsa_circ_0035796 | exonic                   |
| 0.032128144    | 1.5279761       | hsa_circRNA_101740 | hsa_circ_0008616 | exonic                   |
| 0.049057817    | 2.3222936       | hsa_circRNA_101748 | hsa_circ_0003645 | exonic                   |
| 0.01810066     | 2.1755129       | hsa_circRNA_101838 | hsa_circ_0039930 | exonic                   |
| 0.005943973    | 1.5254679       | hsa_circRNA_103417 | hsa_circ_0004788 | exonic                   |
| 0.036592273    | 1.7508295       | hsa_circRNA_103572 | hsa_circ_0008351 | exonic                   |
| 0.005949669    | 4.6603878       | hsa_circRNA_104086 | hsa_circ_0003738 | exonic                   |
| 0.045574811    | 1.79207         | hsa_circRNA_104499 | hsa_circ_0082564 | exonic                   |
| 0.005987429    | 1.6234627       | hsa_circRNA_104940 | hsa_circ_0089153 | exonic                   |
| 0.022270222    | 1.7316345       | hsa_circRNA_400091 | hsa_circ_0092310 | intronic                 |

Table S2 Downregulated circRNAs in psoriatic Tregs

| <b>P-value</b> | <b>FC (abs)</b> | <b>circRNA</b>     | <b>Alias</b>     | <b>circRNA_type</b> |
|----------------|-----------------|--------------------|------------------|---------------------|
| 0.03977296     | 3.054981        | hsa_circRNA_000167 | hsa_circ_0000518 | intragenic          |
| 0.043291906    | 1.9914322       | hsa_circRNA_000274 | hsa_circ_0000919 | intronic            |
| 0.043480055    | 2.0152613       | hsa_circRNA_001059 | hsa_circ_0000554 | intragenic          |
| 0.039331832    | 1.9960006       | hsa_circRNA_001379 | hsa_circ_0000516 | antisense           |
| 0.049249289    | 2.5803992       | hsa_circRNA_001678 | hsa_circ_0000517 | intragenic          |
| 0.043876847    | 3.0505549       | hsa_circRNA_001846 | hsa_circ_0000520 | intragenic          |
| 0.013501149    | 1.5123283       | hsa_circRNA_101592 | hsa_circ_0036287 | exonic              |

Table S3 Primers used in this study

| Gene symbol             |         | Sequences                |
|-------------------------|---------|--------------------------|
| Human<br>IFN- $\gamma$  | Forward | GAGTGTGGAGACCATCAAGGA    |
|                         | Reverse | GTATTGCTTTGCGTTGGACA     |
| Human<br>IL-17          | Forward | CGGACTGTGATGGTCAACCTGAAC |
|                         | Reverse | GGTCCTCATTGCGGTGGAGATTC  |
| Human<br>ROR $\gamma$ T | Forward | AGATACCCTCACCTACACCTTG   |
|                         | Reverse | CCGCTCAGGGCTGTATTCAA     |
| Human<br>RPLP0          | Forward | CGTCCTCGTGGAAGTGACAT     |
|                         | Reverse | CATTCCCCCGGATATGAGGC     |
| Human                   | Forward | TGAGGTGCTGGCTCACATAG     |

|               |         |                          |
|---------------|---------|--------------------------|
| Circ_0003738  | Reverse | AACGACGCCATGAATCTCCA     |
| Human         | Forward | TCATCGAGCCCATTATGAAACTGA |
|               | Reverse | AATGAGCTGGTAAAGGCCAGT    |
| Circ_00039930 | Reverse | AATGAGCTGGTAAAGGCCAGT    |
| Human         | Forward | GCCCAATCTCTCCTGCAAGT     |
| Circ_0001658  | Reverse | CCACCTAGGAGGAACTGACAA    |
